# Supplementary material for: Biodiversity and distribution of polar freshwater DNA viruses
Source: PubMed Central journal article supplement — Sci Adv. 2015 Jun 19;1(5):e1400127. doi: 10.1126/sciadv.1400127 (PMC4640604; doi:10.1126/sciadv.1400127), 2015-06-19
Supplement: 1400127_SM.pdf [file 1400127_SM.pdf]

## Supplementary Materials for **Biodiversity and distribution of polar freshwater DNA viruses**

Daniel Aguirre de Cárcer, Alberto López-Bueno, David A. Pearce, Antonio Alcamí

Published 19 June 2015, *Sci. Adv.* **1**, e1400127 (2015)

DOI: 10.1126/sciadv.1400127

### **This PDF file includes:**

- Fig. S1. Significant circular ssDNA-related contigs.
- Fig. S2. Fine-grain genetic overlap between polar freshwater viromes.
- Fig. S3. Coarse-grain genetic overlap between viromes.
- Fig. S4. NJ trees depicting the relationships between phylogenetic marker genes.
- Table S1. Cross-contig analysis of Arctic viromes.
- Table S2. Taxonomic distribution (%) of assigned metagenomic reads from subsampled freshwater viromes.
- Table S3. Cross-contig analysis of pooled freshwater environments.

## Supplementary Materials

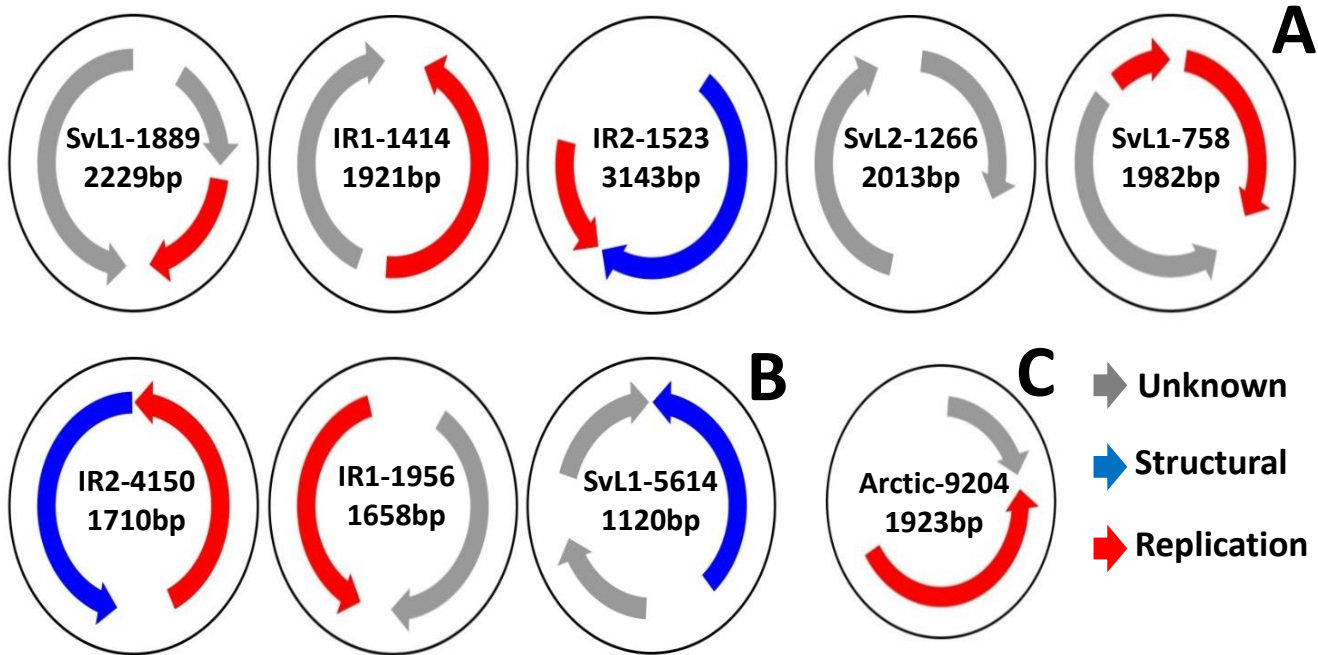

**Supplementary figure 1. Significant circular ssDNA-related contigs.** Contig name and length are shown. ORFs with no major similarities are shown in gray, while those with significant similarities to known viral structural or replication-related proteins are shown in blue and red, respectively. **(A)** Most abundant circular contigs >1000 bp found in each Arctic virome. **(B)** Representatives of the three highly similar contig groups found in at least four of the five Arctic viromes. **(C)** Representative of a shallow lineage found in both Antarctic and Arctic environments.

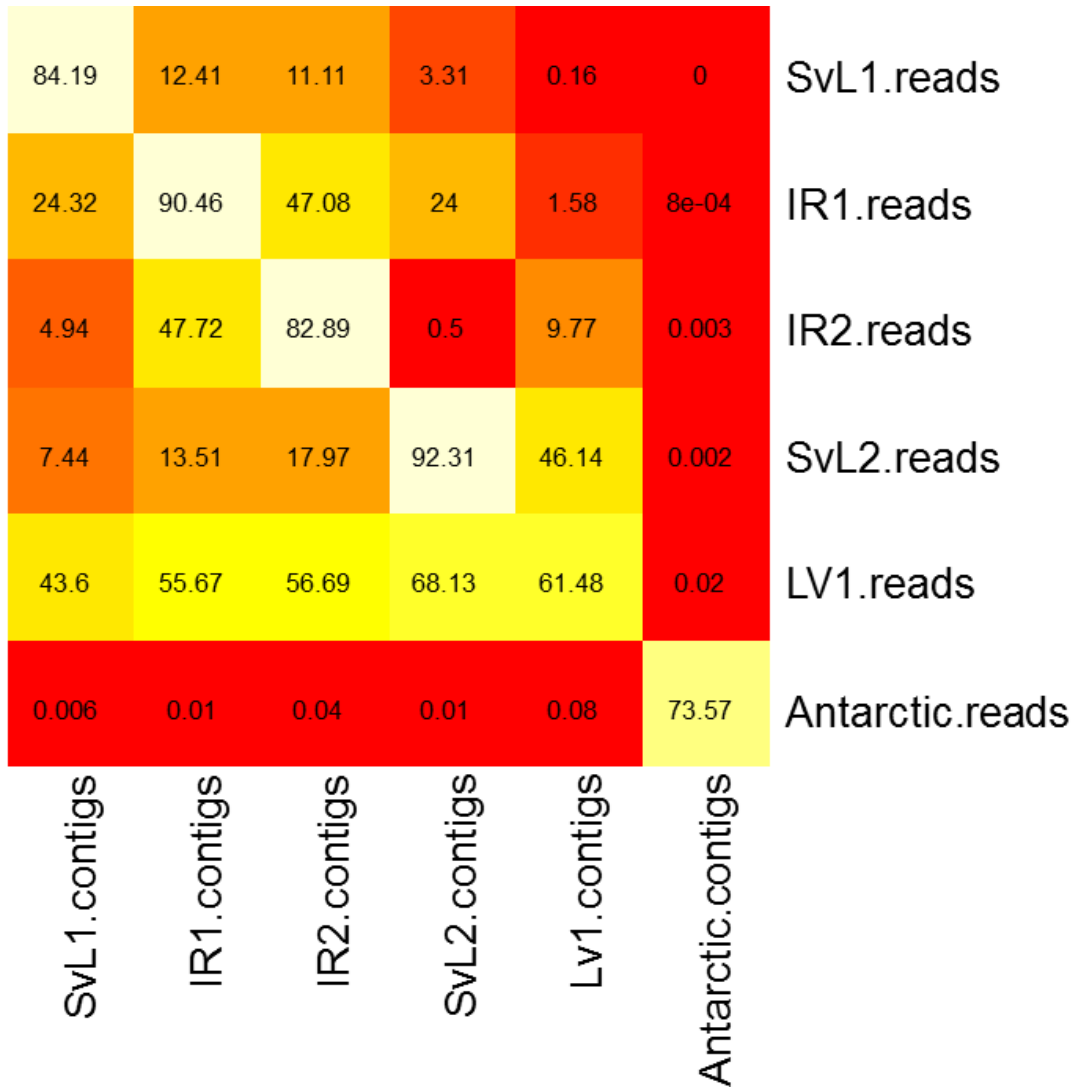

**Supplementary figure 2. Fine-grain genetic overlap between polar freshwater viromes.** The heatmap represents the results of reads-to-contigs mappings with *bowtie2*. Values (% of total reads with hits with  $-score-min L,0,-0.2$ ) are registered within the boxes and color-coded.

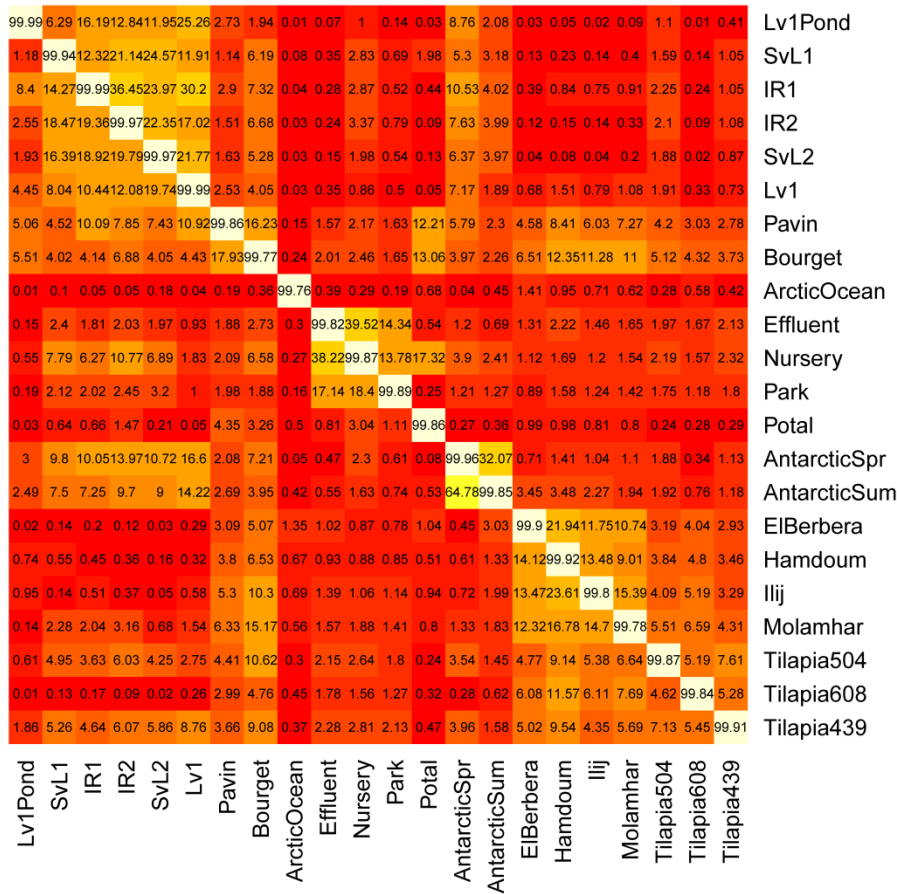

**Supplementary figure 3. Coarse-grain genetic overlap between viromes.** The heatmap represents the results of cross-tBLASTx results. Values (% of total reads with hits with E-value < 0.001) are registered within the boxes and color-coded. Horizontal labels represent viromes acting as query and vertical labels represent viromes acting as reference.

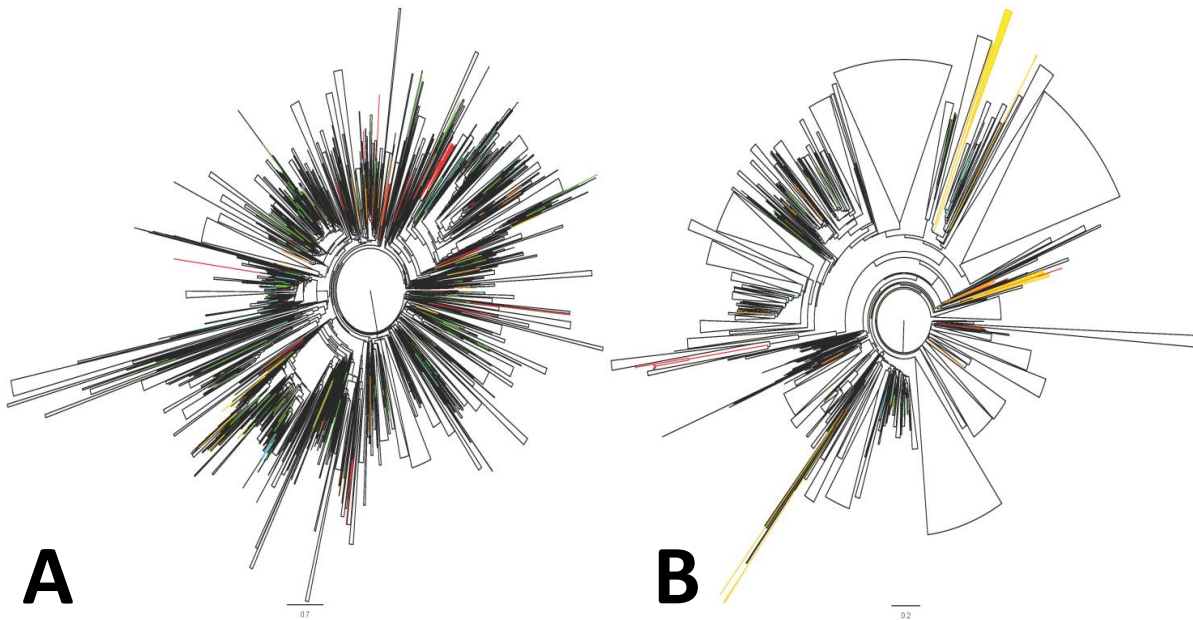

**Supplementary figure 4. NJ trees depicting the relationships between phylogenetic marker genes.** Gene sequences were obtained from Arctic viromes (black and solid white branches), Antarctic viromes (green), Temperate lakes viromes (blue), recently published global sequences (orange), and reference sequences (red). (A) *Circo-Nano-Geminiviridae* (*rep* gene). (B) *Microviridae* (*vp1* gene). Arctic ssDNA viruses are broadly distributed across the known gene diversity spectra. Moreover, it seems that these contigs may expand the known diversity of *vp1* genes as the trees presents several deep-branching clusters with no previously described representatives (B).

**Supplementary table 1. Cross-contig analysis of Arctic viromes.**  
Number of contigs from each Arctic virome sharing at least 500bp at 98% similarity.

|             | <i>SvL1</i> | <i>IR1</i> | <i>IR2</i> | <i>SvL2</i> |
|-------------|-------------|------------|------------|-------------|
| <i>IR1</i>  | 169         |            |            |             |
| <i>IR2</i>  | 252         | 2408       |            |             |
| <i>SvL2</i> | 25          | 37         | 26         |             |
| <i>Lv1</i>  | 21          | 100        | 135        | 49          |

**Supplementary table 2. Taxonomic distribution (%) of assigned metagenomic reads from subsampled freshwater viromes\***. Results represent BLASTx hits against a viral genomes database summarized by MEGAN. Only categories reaching 1% of assigned reads in at least one virome are shown.

|                        | <i>Lv1p</i> | <i>Bou</i> | <i>SvL1</i> | <i>IR1</i> | <i>IR2</i> | <i>SvL2</i> | <i>Lv1</i> | <i>Effl</i> | <i>A.Oce</i> | <i>Nur</i> | <i>Par</i> |
|------------------------|-------------|------------|-------------|------------|------------|-------------|------------|-------------|--------------|------------|------------|
| <i>Ascoviridae</i>     | 0.0         | 0.0        | 0.0         | 0.0        | 0.0        | 0.0         | 0.0        | 0.0         | 1.6          | 0.0        | 0.0        |
| <i>Myoviridae</i>      | 0.0         | 17.7       | 0.7         | 0.9        | 0.4        | 0.0         | 0.8        | 16.4        | 17.3         | 9.5        | 7.7        |
| <i>Podoviridae</i>     | 0.0         | 3.7        | 0.3         | 0.1        | 0.2        | 0.0         | 0.6        | 13.7        | 4.1          | 9.7        | 5.5        |
| <i>Siphoviridae</i>    | 0.0         | 21.4       | 3.8         | 1.0        | 0.3        | 0.0         | 1.3        | 37.6        | 25.5         | 29.0       | 20.7       |
| Unclass.               |             |            |             |            |            |             |            |             |              |            |            |
| <i>Caudovirales</i>    | 0.0         | 0.7        | 0.1         | 0.0        | 0.0        | 0.0         | 0.0        | 0.9         | 1.2          | 0.3        | 0.6        |
| <i>Iridoviridae</i>    | 0.0         | 0.8        | 0.1         | 0.1        | 0.0        | 0.0         | 0.4        | 0.4         | 0.8          | 0.4        | 0.1        |
| <i>Mimiviridae</i>     | 0.0         | 0.2        | 0.0         | 0.1        | 0.0        | 0.0         | 0.0        | 0.2         | 4.5          | 0.0        | 0.2        |
| <i>Phycodnaviridae</i> | 0.0         | 4.2        | 0.2         | 0.5        | 0.1        | 0.0         | 0.0        | 0.9         | 14.8         | 0.9        | 1.1        |
| Unclass. dsDNA phages  | 0.0         | 11.2       | 0.5         | 0.1        | 0.1        | 0.0         | 0.3        | 5.1         | 2.1          | 3.5        | 5.1        |
| Unclass. dsDNA viruses | 0.0         | 0.4        | 0.1         | 0.2        | 0.0        | 0.0         | 0.4        | 0.8         | 2.9          | 0.3        | 0.2        |
| Satellites             | 0.5         | 0.0        | 1.7         | 1.2        | 1.7        | 0.5         | 0.6        | 0.0         | 0.0          | 0.0        | 0.0        |
| <i>Circoviridae</i>    | 13.5        | 0.2        | 37.0        | 41.3       | 22.0       | 56.9        | 42.9       | 0.5         | 0.0          | 2.5        | 0.7        |
| <i>Geminiviridae</i>   | 4.3         | 0.0        | 3.3         | 5.6        | 6.0        | 0.9         | 0.6        | 0.1         | 0.0          | 0.3        | 0.1        |
| <i>Inoviridae</i>      | 0.0         | 0.0        | 0.4         | 0.1        | 0.0        | 0.0         | 0.0        | 0.1         | 4.1          | 0.1        | 0.0        |
| <i>Microviridae</i>    | 1.4         | 13.2       | 8.3         | 11.2       | 14.1       | 1.0         | 1.3        | 0.1         | 0.0          | 3.8        | 0.0        |
| <i>Nanoviridae</i>     | 9.2         | 0.2        | 7.2         | 2.0        | 6.4        | 3.6         | 11.9       | 0.3         | 0.0          | 1.0        | 0.0        |
| Unclass. ssDNA viruses | 70.0        | 0.2        | 28.4        | 28.4       | 39.4       | 35.7        | 34.2       | 2.3         | 0.0          | 22.7       | 48.5       |
| ssRNA viruses          | 0.5         | 0.3        | 1.2         | 0.7        | 1.2        | 0.3         | 0.4        | 0.0         | 0.4          | 0.0        | 0.0        |
| Unclass. phages        | 0.0         | 7.0        | 0.2         | 0.2        | 0.0        | 0.0         | 0.9        | 9.1         | 6.6          | 5.9        | 3.6        |
| <b>%Reads assigned</b> | 0.5         | 4.6        | 3.9         | 3.2        | 5.2        | 6.8         | 2.0        | 2.9         | 0.6          | 3.7        | 4.2        |

  

|                        | <i>Pav</i> | <i>Pot</i> | <i>A.Spr</i> | <i>A.Sum</i> | <i>ElBer</i> | <i>Ham</i> | <i>Ilij</i> | <i>Mol</i> | <i>T504</i> | <i>T608</i> | <i>T439</i> |
|------------------------|------------|------------|--------------|--------------|--------------|------------|-------------|------------|-------------|-------------|-------------|
| <i>Ascoviridae</i>     | 0.0        | 0.0        | 0.0          | 0.6          | 0.1          | 0.1        | 0.1         | 0.0        | 0.0         | 0.0         | 0.0         |
| <i>Myoviridae</i>      | 20.4       | 13.4       | 2.5          | 5.4          | 31.0         | 24.9       | 28.6        | 45.4       | 9.5         | 14.1        | 14.0        |
| <i>Podoviridae</i>     | 4.8        | 9.4        | 2.2          | 0.8          | 10.7         | 11.4       | 6.9         | 5.0        | 23.4        | 27.4        | 25.2        |
| <i>Siphoviridae</i>    | 27.8       | 27.2       | 6.2          | 5.4          | 20.6         | 25.7       | 28.4        | 26.9       | 18.6        | 24.1        | 23.1        |
| Unclass.               |            |            |              |              |              |            |             |            |             |             |             |
| <i>Caudovirales</i>    | 0.5        | 0.9        | 0.0          | 0.1          | 2.2          | 2.4        | 2.9         | 2.1        | 1.4         | 1.9         | 1.9         |
| <i>Iridoviridae</i>    | 0.5        | 0.4        | 0.2          | 0.8          | 1.0          | 1.5        | 0.4         | 1.5        | 0.9         | 1.2         | 0.6         |
| <i>Mimiviridae</i>     | 0.4        | 1.8        | 0.0          | 2.2          | 2.1          | 0.7        | 0.9         | 0.3        | 0.4         | 0.2         | 0.3         |
| <i>Phycodnaviridae</i> | 2.4        | 3.1        | 1.3          | 41.8         | 8.9          | 9.3        | 5.6         | 4.6        | 4.6         | 2.8         | 2.1         |
| Unclass. dsDNA phages  | 4.4        | 4.5        | 1.0          | 0.4          | 4.1          | 3.4        | 6.1         | 4.9        | 6.9         | 10.9        | 7.0         |
| Unclass. dsDNA viruses | 0.5        | 0.0        | 0.2          | 15.4         | 3.4          | 2.2        | 1.6         | 0.7        | 0.5         | 1.2         | 0.6         |
| Satellites             | 0.3        | 0.0        | 0.7          | 0.1          | 0.0          | 0.0        | 0.0         | 0.0        | 0.0         | 0.0         | 0.0         |
| <i>Circoviridae</i>    | 3.0        | 0.0        | 31.9         | 2.8          | 0.0          | 0.0        | 0.0         | 0.0        | 0.3         | 0.0         | 1.4         |
| <i>Geminiviridae</i>   | 0.0        | 0.0        | 1.2          | 0.5          | 0.0          | 0.0        | 0.0         | 0.0        | 0.1         | 0.0         | 2.7         |
| <i>Inoviridae</i>      | 0.0        | 2.7        | 0.2          | 0.1          | 0.2          | 0.1        | 0.0         | 0.0        | 0.4         | 0.0         | 0.3         |

|                        |            |            |            |            |            |            |            |            |            |            |            |
|------------------------|------------|------------|------------|------------|------------|------------|------------|------------|------------|------------|------------|
| <i>Microviridae</i>    | 0.3        | 3.6        | 4.0        | 0.2        | 0.0        | 0.0        | 0.0        | 0.2        | 0.1        | 0.0        | 0.3        |
| <i>Nanoviridae</i>     | 0.7        | 0.0        | 1.8        | 0.5        | 0.0        | 0.0        | 0.0        | 0.0        | 0.1        | 0.0        | 0.5        |
| Unclass. ssDNA viruses | 10.1       | 0.0        | 37.2       | 16.2       | 0.0        | 0.1        | 0.1        | 0.1        | 18.5       | 0.0        | 1.7        |
| ssRNA viruses          | 0.8        | 0.4        | 1.0        | 0.0        | 0.1        | 0.0        | 0.0        | 0.0        | 0.0        | 0.0        | 0.1        |
| Unclass. phages        | 5.7        | 26.8       | 1.0        | 0.9        | 3.3        | 4.2        | 4.0        | 2.2        | 3.3        | 4.1        | 6.0        |
| <b>%Reads assigned</b> | <b>3.0</b> | <b>0.6</b> | <b>1.5</b> | <b>2.7</b> | <b>2.5</b> | <b>3.8</b> | <b>3.6</b> | <b>5.8</b> | <b>3.6</b> | <b>2.7</b> | <b>3.9</b> |

\*Virome names have been unambiguously shortened to fit.



**Supplementary table 3. Cross-contig analysis of pooled freshwater environments;**

Number of contigs from each pooled environment sharing at least 500bp at 98%, 95% and 90% similarity. Results are influenced by total information available for contig reconstruction in each case\*.

| <b>98%</b> | Antarctic | Aquacult. | Arctic | ArctOcean | Sahara | Temperate | Reclaimed |
|------------|-----------|-----------|--------|-----------|--------|-----------|-----------|
| Antarctic  | -         | -         | -      | -         | -      | -         | -         |
| Aquacult.  | 0         | -         | -      | -         | -      | -         | -         |
| Arctic     | 0         | 0         | -      | -         | -      | -         | -         |
| ArctOcean  | 0         | 0         | 0      | -         | -      | -         | -         |
| Sahara     | 26        | 0         | 0      | 0         | -      | -         | -         |
| Temperate  | 0         | 0         | 5      | 0         | 0      | -         | -         |
| Reclaimed  | 0         | 0         | 0      | 0         | 0      | 0         | -         |

| <b>95%</b> | Antarctic | Aquacult. | Arctic | ArctOcean | Sahara | Temperate | Reclaimed |
|------------|-----------|-----------|--------|-----------|--------|-----------|-----------|
| Antarctic  | -         | -         | -      | -         | -      | -         | -         |
| Aquacult.  | 0         | -         | -      | -         | -      | -         | -         |
| Arctic     | 2         | 0         | -      | -         | -      | -         | -         |
| ArctOcean  | 0         | 0         | 0      | -         | -      | -         | -         |
| Sahara     | 28        | 0         | 0      | 0         | -      | -         | -         |
| Temperate  | 0         | 0         | 59     | 0         | 1      | -         | -         |
| Reclaimed  | 0         | 0         | 0      | 0         | 0      | 1         | -         |

| <b>90%</b> | Antarctic | Aquacult. | Arctic | ArctOcean | Sahara | Temperate | Reclaimed |
|------------|-----------|-----------|--------|-----------|--------|-----------|-----------|
| Antarctic  | -         | -         | -      | -         | -      | -         | -         |
| Aquacult.  | 0         | -         | -      | -         | -      | -         | -         |
| Arctic     | 7         | 0         | -      | -         | -      | -         | -         |
| ArctOcean  | 0         | 0         | 0      | -         | -      | -         | -         |
| Sahara     | 32        | 0         | 3      | 0         | -      | -         | -         |
| Temperate  | 13        | 1         | 286    | 0         | 23     | -         | -         |
| Reclaimed  | 1         | 0         | 0      | 0         | 1      | 5         | -         |

\*Antarctic (ca. 240Mbp), Aquaculture (ca. 42Mbp), Arctic (ca. 3,200Mbp), Arctic Ocean (ca. 74Mbp), Sahara (ca. 65Mbp), Temperate lakes (ca. 250Mbp), Reclaimed water (ca. 238Mbp).
